# Supplementary material for: Gender Difference in the Association Between Subjective Socioeconomic Mobility Across Life Course and Mortality at Older Ages: Results From the JAGES Longitudinal Study
Source: PubMed Central journal article supplement (PMC7557171; doi:10.2188/jea.je20190083), 2020-11-05
Supplement: je-30-497-s001.pdf [file je-30-497-s001.pdf]

**eTable 1.** Hazard ratio of SSS mobility, SES, and other covariates among men (area adjusted) (N=7,944)

|                   | Model 1                   | Model 2                   | Model 3            | Model 4            |
|-------------------|---------------------------|---------------------------|--------------------|--------------------|
| Persistently high | ref                       | ref                       | ref                | Ref                |
| Downward          | <b>1.33 (1.05 - 1.69)</b> | <b>1.30 (1.02 - 1.66)</b> | 1.20 (0.94 - 1.54) | 1.22 (0.95 - 1.57) |
| Upward            | 0.90 (0.72 - 1.13)        | 0.89 (0.70 - 1.12)        | 0.86 (0.68 - 1.09) | 0.88 (0.70 - 1.11) |
| Persistently low  | 0.96 (0.74 - 1.25)        | 0.93 (0.71 - 1.22)        | 0.86 (0.65 - 1.13) | 0.84 (0.63 - 1.10) |
|                   | Model 5                   | Model 6                   | Model 7            | Model 8            |
| Persistently high | 1.04 (0.80 - 1.36)        | 1.08 (0.82 - 1.42)        | 1.16 (0.88 - 1.54) | 1.19 (0.91 - 1.58) |
| Downward          | 1.38 (1.06 - 1.81)        | 1.40 (1.07 - 1.84)        | 1.40 (1.07 - 1.83) | 1.46 (1.11 - 1.91) |
| Upward            | 0.94 (0.73 - 1.21)        | 0.96 (0.74 - 1.24)        | 1.00 (0.77 - 1.31) | 1.05 (0.81 - 1.37) |
| Persistently low  | ref                       | ref                       | ref                | Ref                |

BMI, body mass index; GDS, Geriatric Depression Scale; SES, socioeconomic status; SSS, subjective socioeconomic status.

Models 1 and 5 were adjusted for age and prefecture code

Models 2 and 6 were additionally adjusted for height, equivalised income, education, marital status

Models 3 and 7 were additionally adjusted for GDS\*\*\*

Models 4 and 8 were additionally adjusted for smoking status, drinking habits, BMI\*\*\*\*\* and walking times

**eTable 2.** Hazard ratios of SSS mobility, SES, and other covariates among women (area adjusted)

(N=8,746)

|                   | Model 1                 | Model 2                 | Model 3          | Model 4          |
|-------------------|-------------------------|-------------------------|------------------|------------------|
| Persistently high | ref                     | ref                     | ref              | Ref              |
| Downward          | 1.28 (0.95–1.72)        | 1.24 (0.91–1.68)        | 1.12 (0.82–1.52) | 1.07 (0.78–1.45) |
| Upward            | 0.76 (0.52–1.10)        | 0.74 (0.51–1.08)        | 0.73 (0.50–1.07) | 0.73 (0.50–1.07) |
| Persistently low  | 1.34 (0.92–1.96)        | 1.21 (0.83–1.79)        | 1.08 (0.73–1.60) | 1.03 (0.69–1.53) |
|                   | Model 5                 | Model 6                 | Model 7          | Model 8          |
| Persistently high | 0.75 (0.51–1.09)        | 0.82 (0.56–1.21)        | 0.92 (0.62–1.37) | 0.97 (0.66–1.44) |
| Downward          | 0.95 (0.66–1.38)        | 1.02 (0.70–1.48)        | 1.03 (0.71–1.50) | 1.04 (0.71–1.51) |
| Upward            | <b>0.56 (0.37–0.87)</b> | <b>0.61 (0.39–0.94)</b> | 0.67 (0.43–1.05) | 0.71 (0.45–1.10) |
| Persistently low  | ref                     | ref                     | ref              | ref              |

BMI, body mass index; GDS, Geriatric Depression Scale; SES, socioeconomic status; SSS, subjective socioeconomic status.

Models 1 and 5 were adjusted for age and prefecture code

Models 2 and 6 were additionally adjusted for height, equivalised income, education, marital status

Models 3 and 7 were additionally adjusted for GDS\*\*\*

Models 4 and 8 were additionally adjusted for smoking status, drinking habits, BMI\*\*\*\*\* and walking times

**eTable 3.** Hazard ratio of SSS mobility, SES, and other covariates among men (the longest job adjusted) (N=7,944)

|                   | Model 1                 | Model 2                 | Model 3          | Model 4          |
|-------------------|-------------------------|-------------------------|------------------|------------------|
| Persistently high | ref                     | ref                     | ref              | Ref              |
| Downward          | <b>1.37 (1.08–1.74)</b> | <b>1.32 (1.03–1.69)</b> | 1.19 (0.93–1.53) | 1.18 (0.92–1.52) |
| Upward            | 0.87 (0.69–1.09)        | 0.86 (0.68–1.08)        | 0.83 (0.66–1.05) | 0.84 (0.67–1.06) |
| Persistently low  | 0.95 (0.73–1.24)        | 0.90 (0.68–1.18)        | 0.82 (0.62–1.08) | 0.76 (0.58–1.01) |
|                   | Model5                  | Model6                  | Model7           | Model8           |
| Persistently high | 1.05 (0.80–1.37)        | 1.12 (0.85–1.47)        | 1.22 (0.92–1.61) | 1.31 (0.99–1.74) |
| Downward          | 1.44 (1.10–1.88)        | 1.47 (1.12–1.93)        | 1.45 (1.11–1.90) | 1.55 (1.18–2.03) |
| Upward            | 0.91 (0.71–1.18)        | 0.96 (0.74–1.24)        | 1.01 (0.78–1.32) | 1.11 (0.85–1.44) |
| Persistently low  | ref                     | ref                     | ref              | Ref              |

BMI, body mass index; GDS, Geriatric Depression Scale; SES, socioeconomic status; SSS, subjective socioeconomic status.

Models 1 and 5 were adjusted for age and prefecture code

Models 2 and 6 were additionally adjusted for height, equivalised income, education, marital status

Models 3 and 7 were additionally adjusted for GDS\*\*\*

Models 4 and 8 were additionally adjusted for smoking status, drinking habits, BMI\*\*\*\*\* and walking times

**eTable 4.** Hazard ratios of SSS mobility, SES, and other covariates among women (the longest job adjusted) (N=8,746)

|                   | Model 1                 | Model 2                 | Model 3          | Model 4          |
|-------------------|-------------------------|-------------------------|------------------|------------------|
| Persistently high | ref                     | ref                     | ref              | Ref              |
| Downward          | 1.27 (0.94–1.71)        | 1.20 (0.88–1.63)        | 1.09 (0.80–1.48) | 1.06 (0.78–1.45) |
| Upward            | 0.71 (0.49–1.04)        | 0.71 (0.48–1.03)        | 0.70 (0.48–1.02) | 0.71 (0.48–1.03) |
| Persistently low  | 1.33 (0.91–1.94)        | 1.20 (0.82–1.77)        | 1.08 (0.73–1.60) | 1.02 (0.69–1.52) |
|                   | Model5                  | Model6                  | Model7           | Model8           |
| Persistently high | 0.75 (0.52–1.10)        | 0.83 (0.56–1.22)        | 0.93 (0.63–1.37) | 0.98 (0.66–1.45) |
| Downward          | 0.95 (0.66–1.38)        | 1.00 (0.69–1.45)        | 1.01 (0.70–1.47) | 1.04 (0.71–1.51) |
| Upward            | <b>0.54 (0.35–0.83)</b> | <b>0.59 (0.38–0.91)</b> | 0.64 (0.42–1.00) | 0.69 (0.44–1.08) |
| Persistently low  | ref                     | ref                     | ref              | ref              |

BMI, body mass index; GDS, Geriatric Depression Scale; SES, socioeconomic status; SSS, subjective socioeconomic status.

Models 1 and 5 were adjusted for age and prefecture code

Models 2 and 6 were additionally adjusted for height, equivalised income, education, marital status

Models 3 and 7 were additionally adjusted for GDS\*\*\*

Models 4 and 8 were additionally adjusted for smoking status, drinking habits, BMI\*\*\*\*\* and walking times
